# Supplementary material for: The primary deep-UV photochemistry of aqueous fumarate and maleate
Source: Royal Society of Chemistry journal article supplement (doi:10.1039/d5cp03064a), 2025-12-22
Supplement: d5cp03064a1.pdf [file d5cp03064a1.pdf]

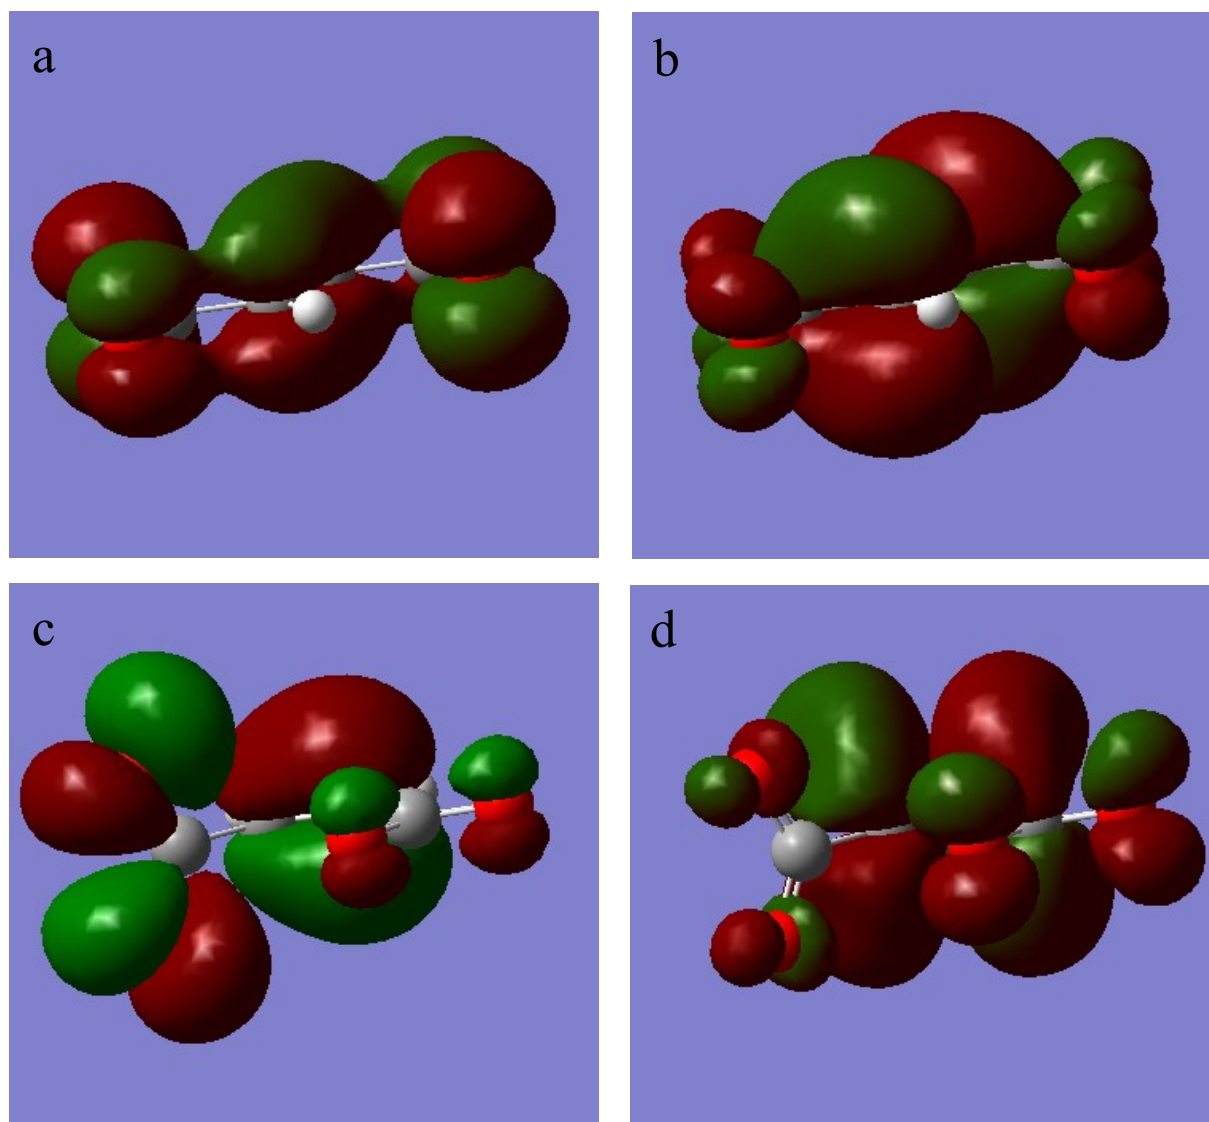

Fig. S11 The natural transition orbitals for the  $\pi \leftarrow \pi^*$  excitation of fumarate (a,b) and maleate (c,d).

1  
2  
3

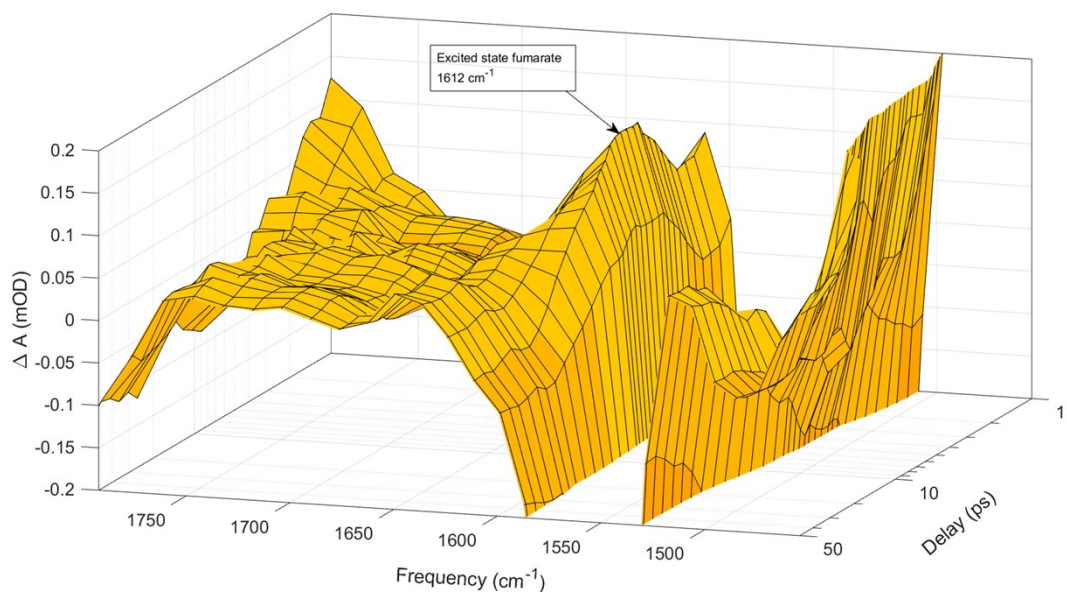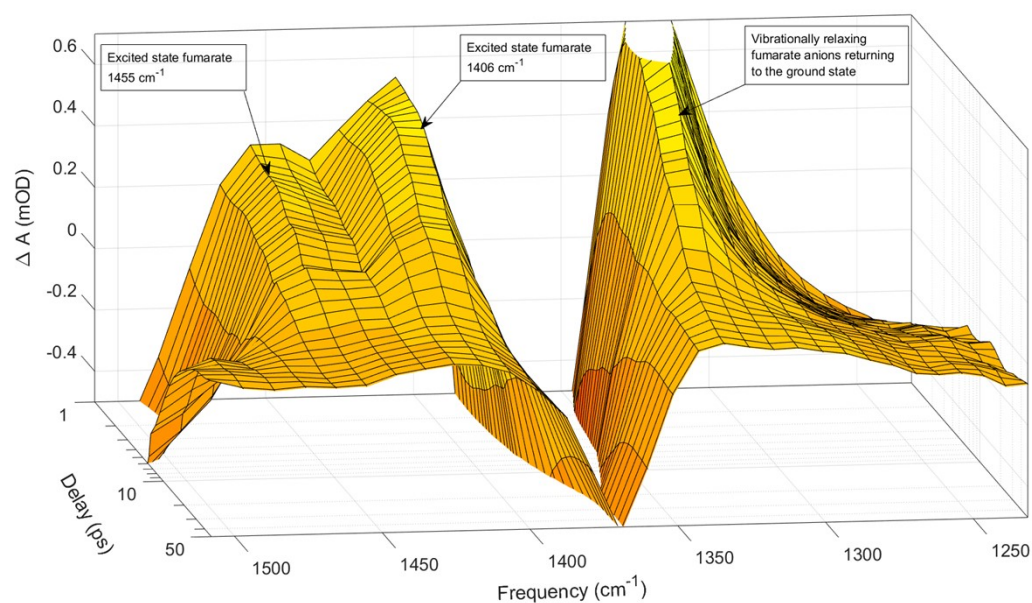

Fig. SI2. The transient absorption spectra of aqueous fumarate recorded as a function of time after the 200 nm excitation pulse. Here shown on a logarithmic timescale between 1ps and 50 ps. The lowest excited state of fumarate,  $^1A_u$ , is identified by its  $1406 \text{ cm}^{-1}$ ,  $1455 \text{ cm}^{-1}$  and  $1612 \text{ cm}^{-1}$  vibrational transitions observed at short delays. Also shown is the induced absorption associated with vibrationally relaxing fumarate anions returning to the ground state.

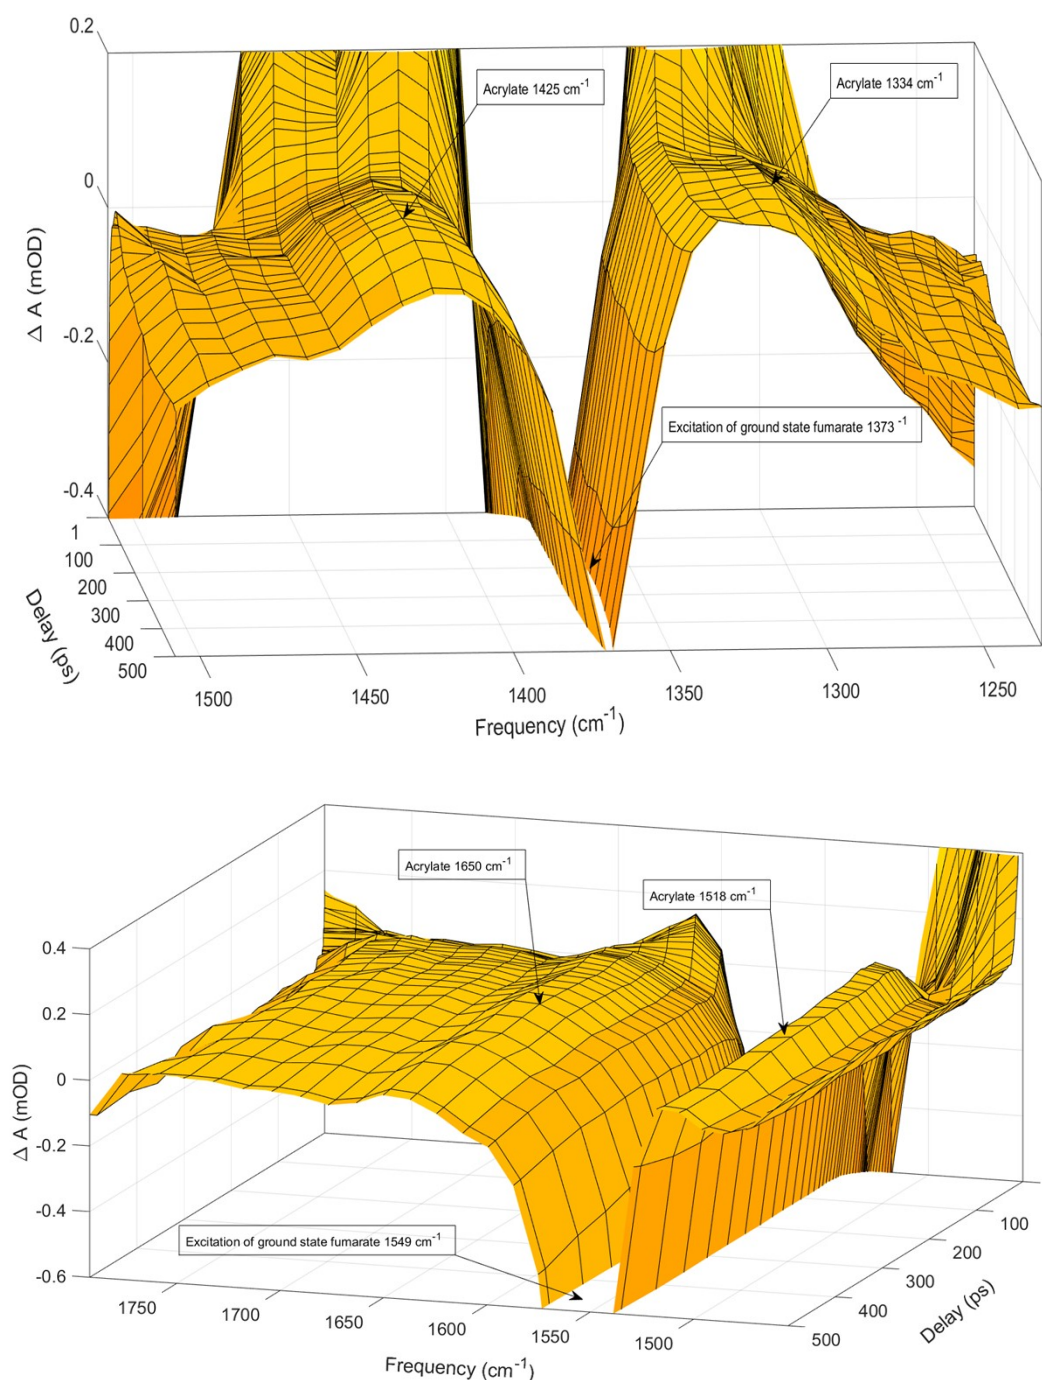

Fig. SI3. The transient absorption spectra of aqueous fumarate recorded as a function of time after the 200 nm excitation pulse. Here shown on a linear timescale between 1ps and 500 ps and with a truncated induced absorption axis. Acrylate is identified by the 1334  $\text{cm}^{-1}$  and 1425  $\text{cm}^{-1}$  transitions observed at long delays on either side of fumarate's symmetric carboxylate stretch at 1373  $\text{cm}^{-1}$ . In addition, acrylate is identified by its asymmetric carboxylate stretch transition observed at 1518  $\text{cm}^{-1}$  on the low frequency flank of the negative absorption pertaining to fumarate's asymmetric carboxylate stretch at 1549  $\text{cm}^{-1}$ . Acrylate's transition expected at 1639  $\text{cm}^{-1}$  shows up as the positive absorption around 1650  $\text{cm}^{-1}$ .



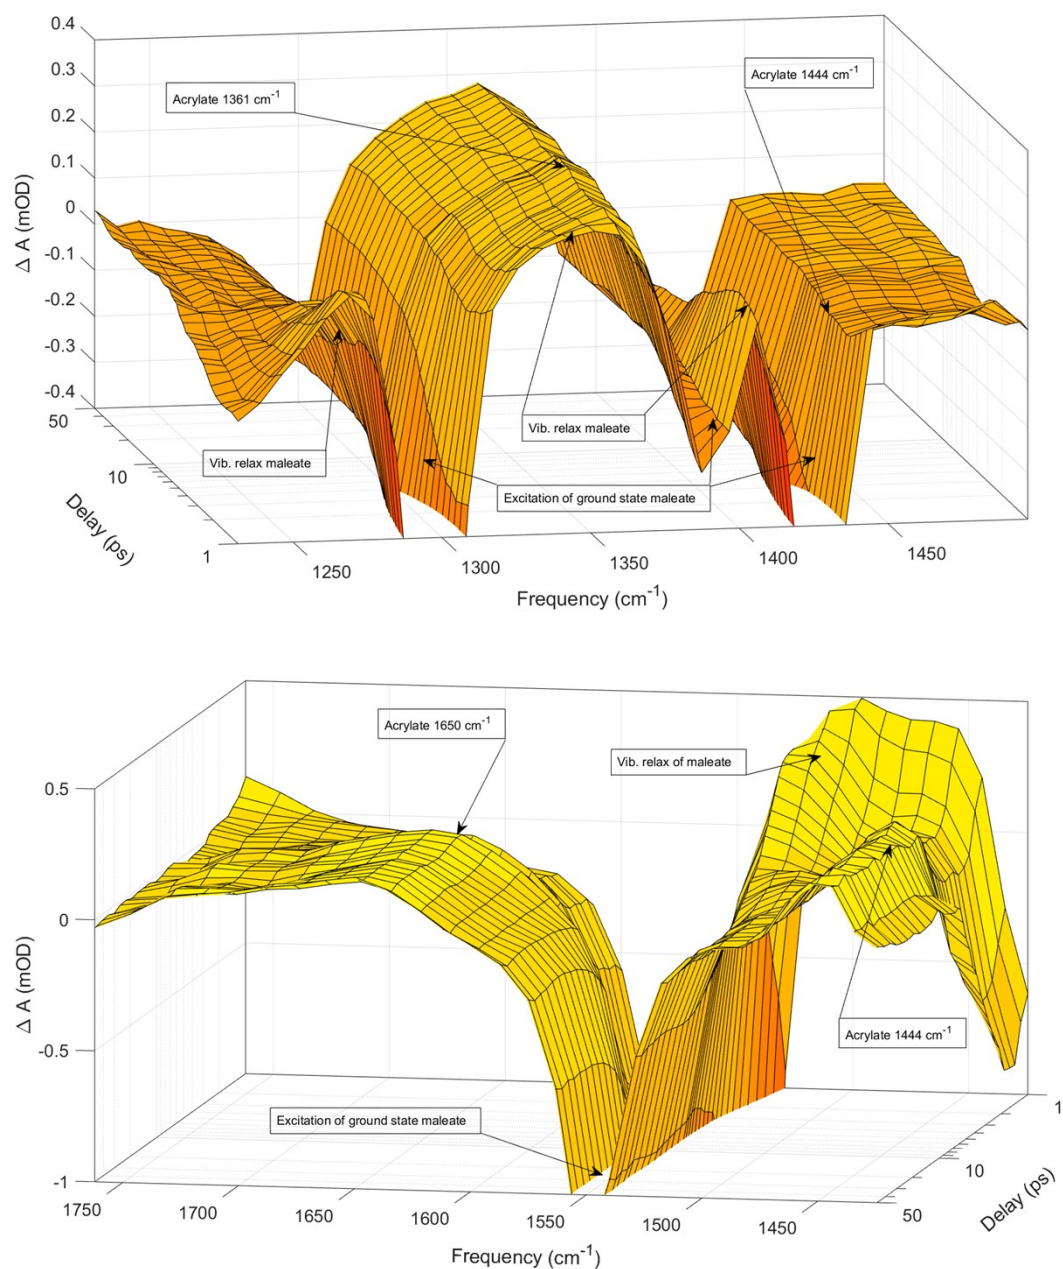

Fig. SI4. The transient absorption spectra of aqueous maleate recorded for the first 50 ps after the 200 nm excitation pulse. The spectra are shown on a logarithmic timescale with truncated induced absorption axis. Acrylate is identified by the positive absorption at 1361  $\text{cm}^{-1}$ , 1444  $\text{cm}^{-1}$  and 1650  $\text{cm}^{-1}$ , while its transition at 1548  $\text{cm}^{-1}$  is dominated by the negative absorption associated with the asymmetric carboxylate stretch of maleate. Acrylate appears 3 ps after the photoexcitation of maleate.

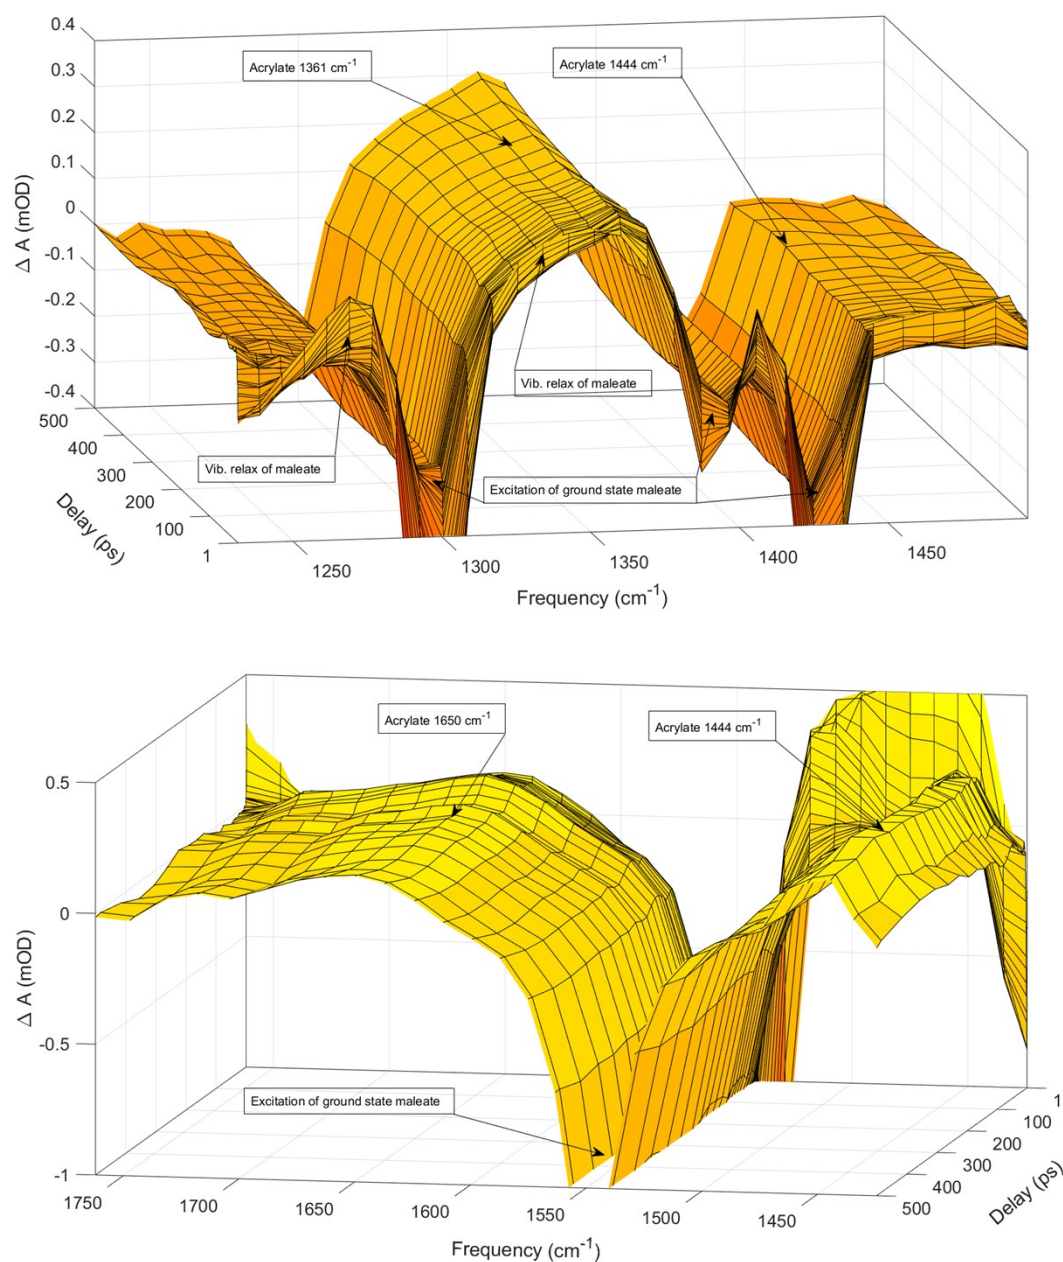

Fig. SI5. The transient absorption spectra of aqueous maleate recorded for the first 500 ps after the 200 nm excitation pulse. The data are shown on a linear timescale with truncated induced absorption axis. Acrylate is identified by the positive absorption at 1361  $\text{cm}^{-1}$ , 1444  $\text{cm}^{-1}$  and 1650  $\text{cm}^{-1}$ , while its transition at 1548  $\text{cm}^{-1}$  is dominated by the negative absorption associated with the asymmetric carboxylate stretch of maleate

9

10

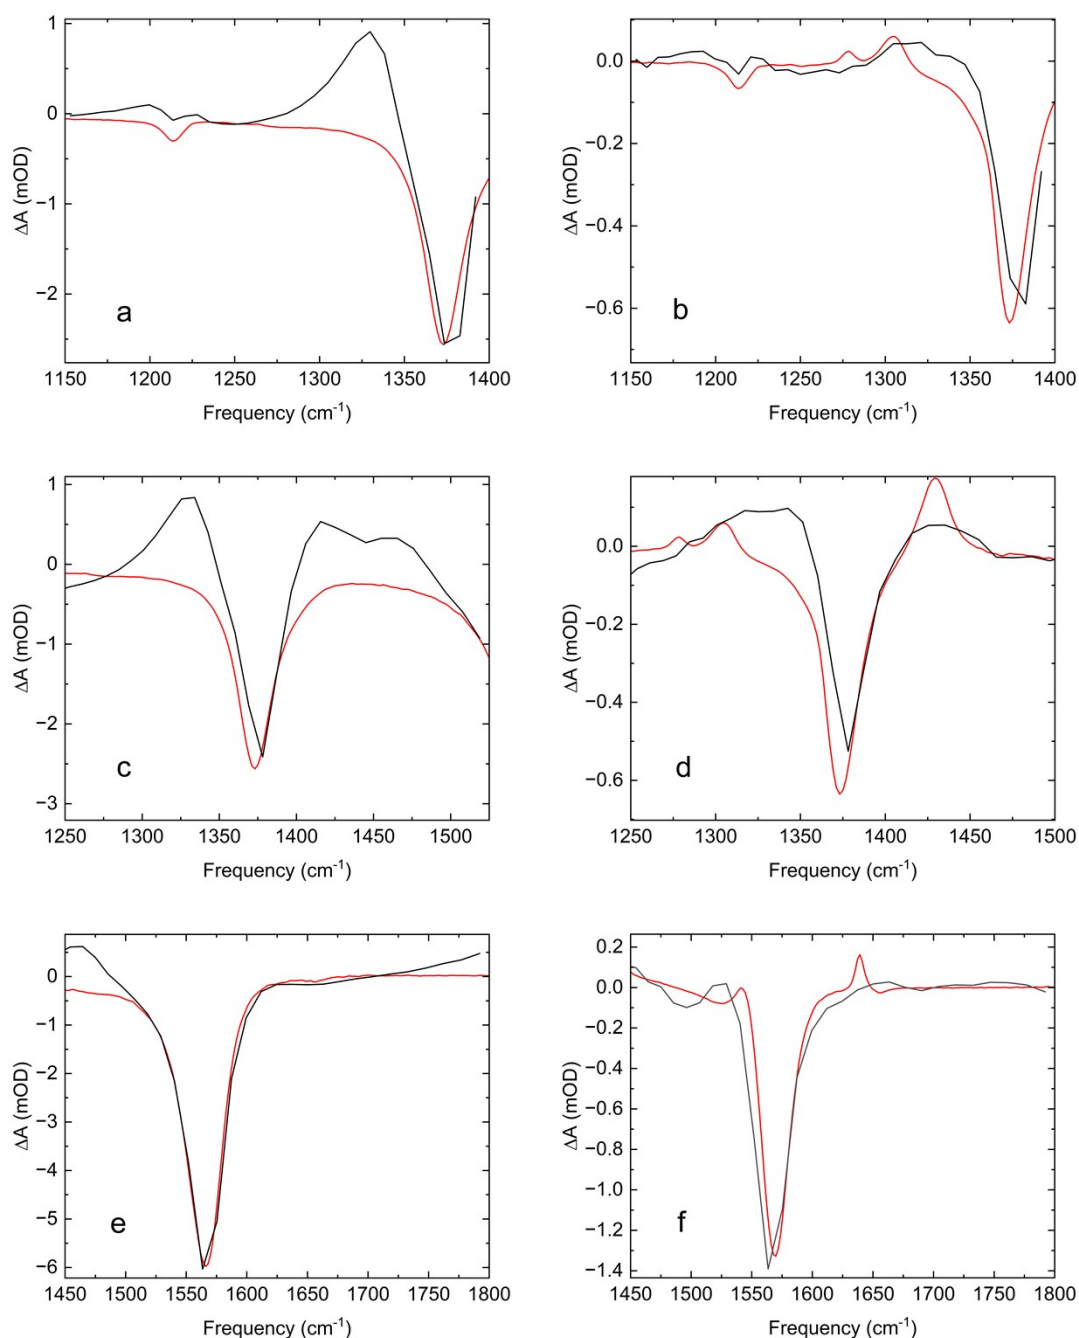

Fig. SI6 The figures (a), (c), and (e) compare the transient absorption recorded in fumarate after 1 ps (black curve) to the inverted steady state absorption spectrum of ground state fumarate (red curve). The figures (b), (d) and (f) compare the transient absorption after 100 ps (black curve) to the weighted sum of the inverted steady state absorption spectrum of ground state fumarate and the positive absorption from acrylate formed after decarboxylation of fumarate, in addition to maleate formed by isomerization of fumarate with yields of 20 % and 7%, respectively (red curve).

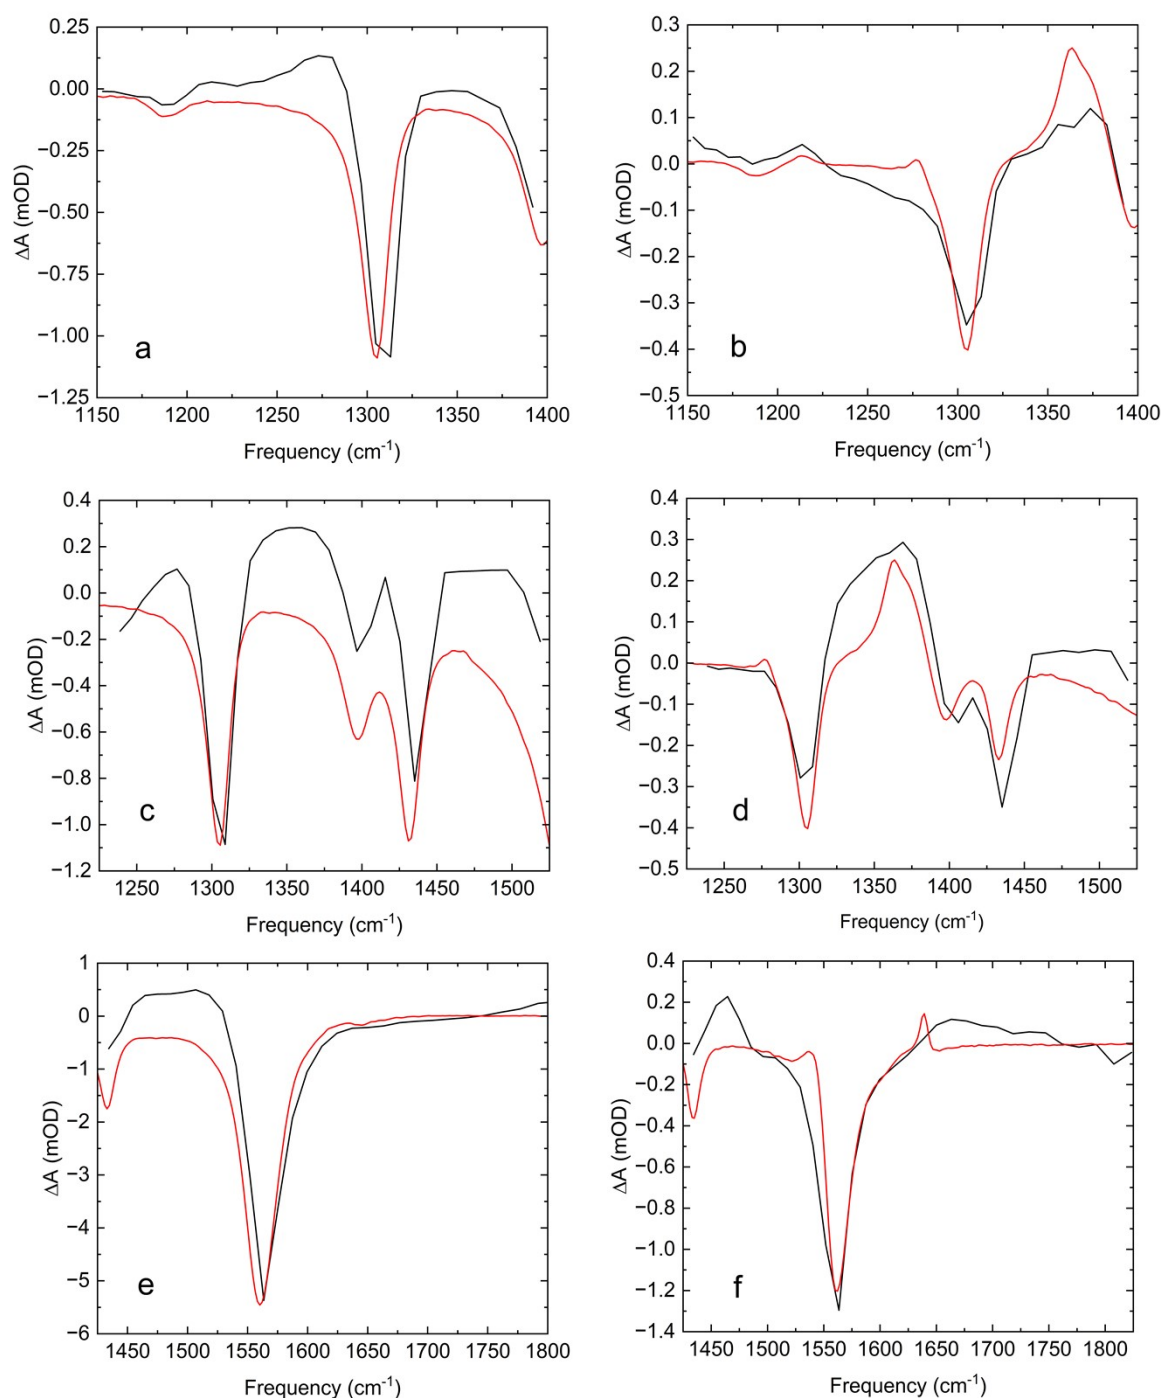

Fig. SI7. The figures (a), (c), and (e) compare the transient absorption recorded in maleate after 1 ps (black curve) to the inverted steady state absorption spectrum of ground state maleate (red curve). The figures (b), (d) and (f) compare the transient absorption after 100 ps (black curve) to the weighted sum of the inverted steady state absorption spectrum of ground state maleate and the positive absorption from acrylate formed after decarboxylation of maleate, in addition to fumarate formed by isomerization of maleate with yields of 20 % and 10%, respectively (red curve).





14

15 Table SI1 Calculated transition frequencies and intensities for ground state Fumarate + 4 D<sub>2</sub>O compared to  
 16 measured transition frequencies.

| 17 Vibration                                            | Harm. Freq.         | Anharm. Freq.       | Harm. Int. | Anharm. Int. | Measured Freq.      |
|---------------------------------------------------------|---------------------|---------------------|------------|--------------|---------------------|
| 18                                                      | (cm <sup>-1</sup> ) | (cm <sup>-1</sup> ) | (km/mol)   | (km/mol)     | (cm <sup>-1</sup> ) |
| 19 out-of-plane CH bend                                 | 1020                | 1004                | 59         | 40           |                     |
| 20 asym. in-plane CH bend                               | 1221                | 1071                | 14.2       | 35           | 1213                |
| 21 sym. in-plane CH bend                                | 1296                | 1195                | 0          | 0            | 1276                |
| 22 asym. comb. sym. CO <sub>2</sub> <sup>-</sup> str.   | 1416                | 1390                | 1092       | 512          | 1373                |
| 23 sym. comb. sym. CO <sub>2</sub> <sup>-</sup> str.    | 1447                | 1420                | 0          | 0            |                     |
| 24 out-of-phase CO <sub>2</sub> <sup>-</sup> asym. str. | 1620                | 1597                | 2          | 54           |                     |
| 25 in-phase CO <sub>2</sub> <sup>-</sup> asym. str.     | 1621                | 1591                | 1701       | 852          | 1558                |
| 26 C=C str.                                             | 1745                | 1696                | 0          | 0            | 1655                |

27

28

29

30 Table SI2 Calculated transition frequencies and intensities for ground state Maleate + 4 D<sub>2</sub>O compared to  
 31 measured transition frequencies.

| 32 Vibration                                            | Harm. Freq.         | Anharm. Freq.       | Harm. Int. | Anharm. Int. | Measured Freq.      |
|---------------------------------------------------------|---------------------|---------------------|------------|--------------|---------------------|
| 33                                                      | (cm <sup>-1</sup> ) | (cm <sup>-1</sup> ) | (km/mol)   | (km/mol)     | (cm <sup>-1</sup> ) |
| 34 out-of-plane CH bend                                 | 1010                | 1001                | 1          | 1            |                     |
| 35 asym. in-plane CH bend                               | 1214                | 1183                | 32         | 27           | 1186                |
| 36 sym. in-plane CH bend                                | 1342                | 1314                | 214        | 49           | 1305                |
| 37 asym. comb. sym. CO <sub>2</sub> <sup>-</sup> str.   | 1445                | 1417                | 299        | 24           | 1396                |
| 38 sym. comb. sym. CO <sub>2</sub> <sup>-</sup> str.    | 1472                | 1442                | 328        | 247          | 1431                |
| 39 out-of-phase CO <sub>2</sub> <sup>-</sup> asym. str. | 1615                | 1587                | 876        | 374          |                     |
| 40 in-phase CO <sub>2</sub> <sup>-</sup> asym. str.     | 1620                | 1597                | 946        | 275          | 1558                |
| 41 C=C str.                                             | 1732                | 1696                | 44         | 7            | 1655                |

42

43

44

45 Table SI3 Calculated transition frequencies and intensities for lowest excited state Fumarate <sup>1</sup>A<sub>u</sub> + 6 D<sub>2</sub>O  
 46 compared to observed transient absorption frequencies.

| 47 Vibration                               | Harm. Freq.         | Anharm. Freq.       | Harm. Int. | Measured Freq.      |
|--------------------------------------------|---------------------|---------------------|------------|---------------------|
| 48                                         | (cm <sup>-1</sup> ) | (cm <sup>-1</sup> ) | (km/mol)   | (cm <sup>-1</sup> ) |
| 49 C-C str.                                | 1005                | 1041                | 7          |                     |
| 50 asym. in-plane CH bend                  | 1188                | 1559                | 58         |                     |
| 51 sym. in-plane CH bend                   | 1240                | 1135                | 103        |                     |
| 52 asym. CO <sub>2</sub> <sup>-</sup> str. | 1287                | 1251                | 78         |                     |
| 53 sym. CO <sub>2</sub> <sup>-</sup> str.  | 1400                | 1359                | 1326       | 1406                |
| 54 sym. CO <sub>2</sub> <sup>-</sup> str.  | 1472                | 1491                | 1079       | 1455                |
| 55 asym. CO <sub>2</sub> <sup>-</sup> str. | 1561                | 1571                | 1266       | ~1612               |
| 56 C=C str.                                | 1715                | 1678                | 164        |                     |

57

58

59

60

61 Table SI4 Calculated transition frequencies and intensities for lowest excited state Maleate  $^1A'$  + 6D<sub>2</sub>O.

62

| Vibration                                                              | Harm. Freq.<br>(cm <sup>-1</sup> ) | Anharm. Freq.<br>(cm <sup>-1</sup> ) | Harm. Int.<br>(km/mol) |
|------------------------------------------------------------------------|------------------------------------|--------------------------------------|------------------------|
| 65 sym. in-plane CH bend                                               | 1166                               | 1114                                 | 141                    |
| 66 comb. sym. CO <sub>2</sub> <sup>-</sup> str.+CH sym. bend           | 1258                               | 1217                                 | 16                     |
| 67 comb. asym. CO <sub>2</sub> <sup>-</sup> str.+ sym. CH bend         | 1375                               | 1335                                 | 980                    |
| 68 asym. comb. sym. CO <sub>2</sub> <sup>-</sup> str.+in-plane CH bend | 1418                               | 1384                                 | 40                     |
| 69 sym. comb. asym CO <sub>2</sub> <sup>-</sup> str.+in-plane CH bend  | 1455                               | 1407                                 | 561                    |
| 70 asym. comb. asym. CO <sub>2</sub> <sup>-</sup> +in-plane CH bend    | 1489                               | 1437                                 | 1892                   |
| 71 C=C str.                                                            | 1660                               | 1602                                 | 136                    |

72

73

74

75

76

77 Table SI5 Observed transients 100 ps after photodissociation of fumarate and the transition frequencies of  
 78 acrylate measured by FTIR (Fig. 2(e) and (f)). Our calculations show that in the spectral region where we  
 79 applied D<sub>2</sub>O as solvent the spectral shift between the two isotopomers is less than 6 cm<sup>-1</sup>.

80

| Vibration                                                                             | Acrylate Freq.<br>(cm <sup>-1</sup> ) | Observed Freq.<br>(cm <sup>-1</sup> ) |
|---------------------------------------------------------------------------------------|---------------------------------------|---------------------------------------|
| 83 C-C str. + in-plane CH bend                                                        | 1063                                  |                                       |
| 84 in-plane CH bend                                                                   | 1279                                  |                                       |
| 85 in-phase sym. str. CO <sub>2</sub> <sup>-</sup> sym. CH <sub>2</sub> bend          | 1361                                  | ~1334                                 |
| 86 out-of-phase sym. CO <sub>2</sub> <sup>-</sup> str.+ CH <sub>2</sub> in-plane bend | 1431                                  | 1425                                  |
| 87 asym. CO <sub>2</sub> <sup>-</sup> str.                                            | 1548                                  | ~1518                                 |
| 88 C=C str.                                                                           | 1639                                  | 1650                                  |

89

90

91

92

93

94 Table SI6 Calculated transition frequencies and intensities for <sup>-</sup>HC=CHCO<sub>2</sub><sup>-</sup> + 2 D<sub>2</sub>O

95

| Harm. Freq.<br>(cm <sup>-1</sup> ) | Anharm. Freq.<br>(cm <sup>-1</sup> ) | Harm. Int.<br>(km/mol) | Anharm. Int.<br>(km/mol) |
|------------------------------------|--------------------------------------|------------------------|--------------------------|
| 98 1060                            | 1325                                 | 48                     | 63                       |
| 99 1130                            | 1686                                 | 3                      | 27                       |
| 100 1306                           | 1390                                 | 36                     | 36                       |
| 101 1404                           | 1363                                 | 690                    | 522                      |
| 102 1534                           | 1506                                 | 503                    | 586                      |
| 103 1584                           | 1562                                 | 360                    | 68                       |

104

105

106

107 Table SI7 Calculated transition frequencies and intensities for <sup>•</sup>HC=CHCO<sub>2</sub><sup>-</sup> + 2 D<sub>2</sub>O

108

| Harm. Freq.<br>(cm <sup>-1</sup> ) | Anharm. Freq.<br>(cm <sup>-1</sup> ) | Harm. Int. (km/mol)<br>(km/mol) | Anharm. Int.<br>(km/mol) |
|------------------------------------|--------------------------------------|---------------------------------|--------------------------|
| 111 1206                           | 1158                                 | 41                              | 23                       |
| 112 1391                           | 1363                                 | 547                             | 368                      |
| 113 1634                           | 1595                                 | 722                             | 65                       |
| 114 1676                           | 1645                                 | 166                             | 439                      |

115

116

117 Table SI8

118 Lowest triplet excited state + 2 D<sub>2</sub>O common to fumarate and maleate.

119

| 120 | Harm. Freq. (cm <sup>-1</sup> ) | Anharm. Freq. (cm <sup>-1</sup> ) | Harm. Int. (km/mol) |
|-----|---------------------------------|-----------------------------------|---------------------|
| 121 | 1115                            | 1206                              | 4                   |
| 122 | 1239                            | 1273                              | 273                 |
| 123 | 1362                            | 1347                              | 23                  |
| 124 | 1388                            | 1370                              | 762                 |
| 125 | 1419                            | 1390                              | 340                 |
| 126 | 1586                            | 1571                              | 1861                |
| 127 | 1589                            | 1572                              | 282                 |

128

129

130 Table SI9 Observed transients 100 ps after photodissociation of maleate and the measured transition frequencies  
 131 of acrylate measured by FTIR (Fig. 2(e) and (f)). Our calculations show that in the spectral region where we  
 132 applied D<sub>2</sub>O as solvent the spectral shift between the two isotopomers is less than 6 cm<sup>-1</sup>.

133

| 134 | Vibration                                                                          | Acrylate Freq.<br>(cm <sup>-1</sup> ) | Observed Freq.<br>(cm <sup>-1</sup> ) |
|-----|------------------------------------------------------------------------------------|---------------------------------------|---------------------------------------|
| 135 |                                                                                    |                                       |                                       |
| 136 | C-C str. + in-plane CH bend                                                        | 1063                                  |                                       |
| 137 | in-plane CH bend                                                                   | 1279                                  |                                       |
| 138 | in-phase sym. str. CO <sub>2</sub> <sup>-</sup> sym. CH <sub>2</sub> bend          | 1361                                  | ~1361                                 |
| 139 | out-of-phase sym. CO <sub>2</sub> <sup>-</sup> str.+ CH <sub>2</sub> in-plane bend | 1431                                  | 1444                                  |
| 140 | asym. CO <sub>2</sub> <sup>-</sup> str.                                            | 1548                                  |                                       |
| 141 | C=C str.                                                                           | 1639                                  | 1650                                  |

142
